# Supplementary material
Source: PubMed Central journal article supplement (PMC4146344)

# Suppl. Figure 1A

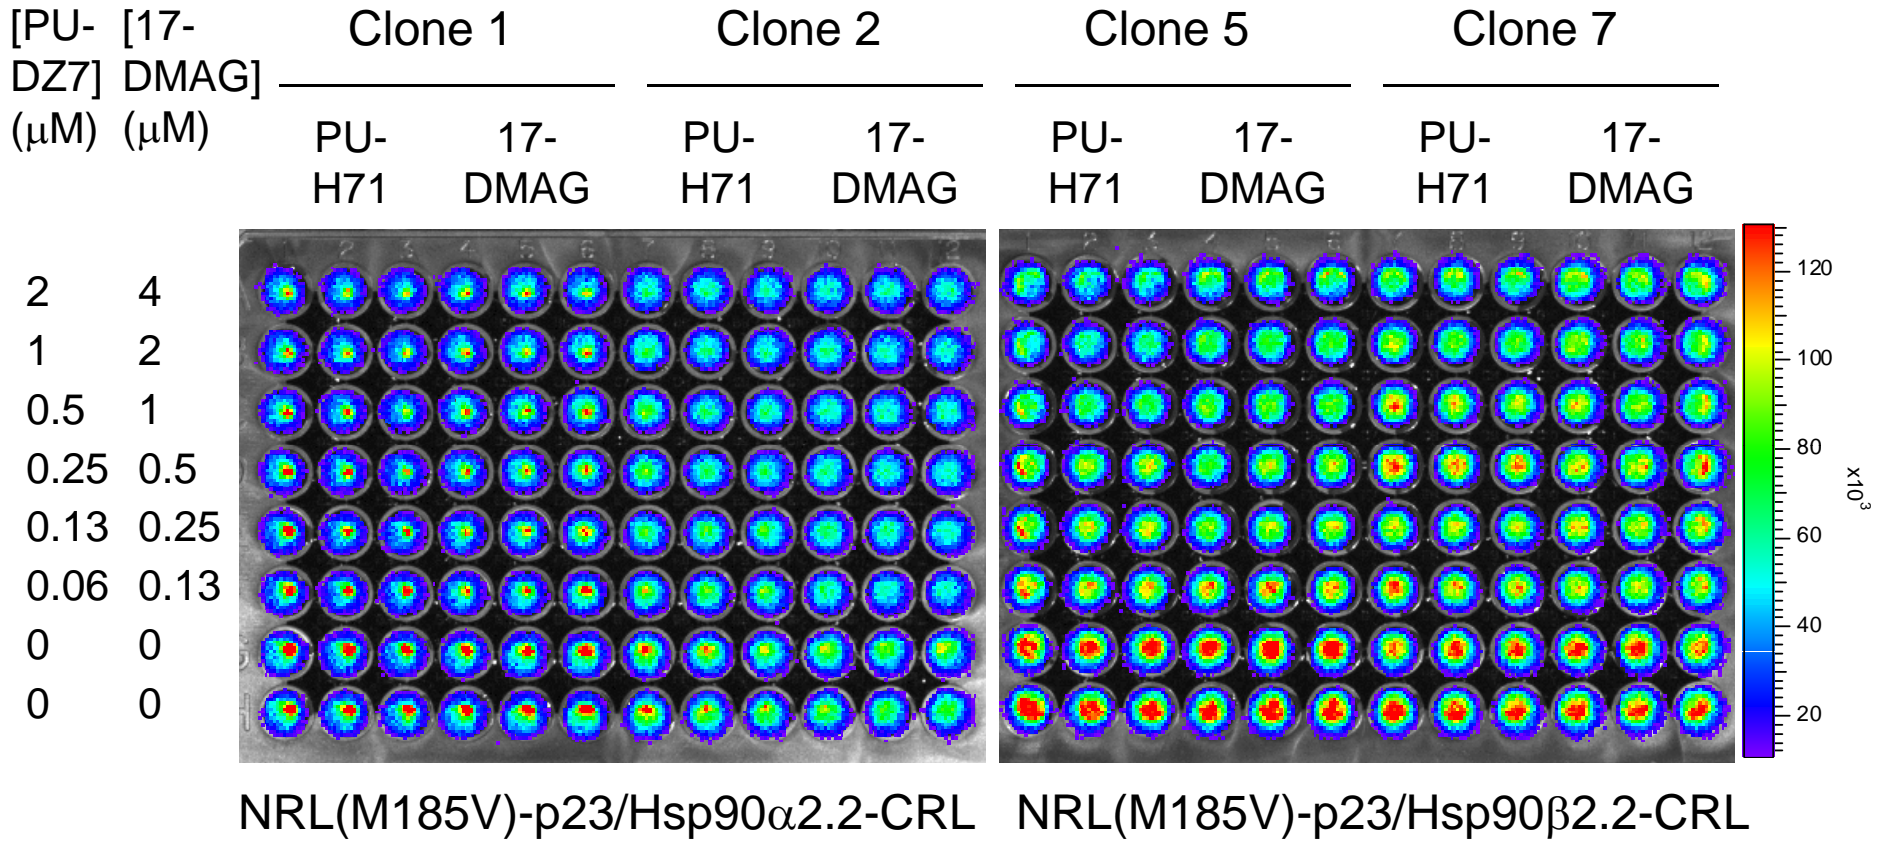

# Suppl. Figure 1B

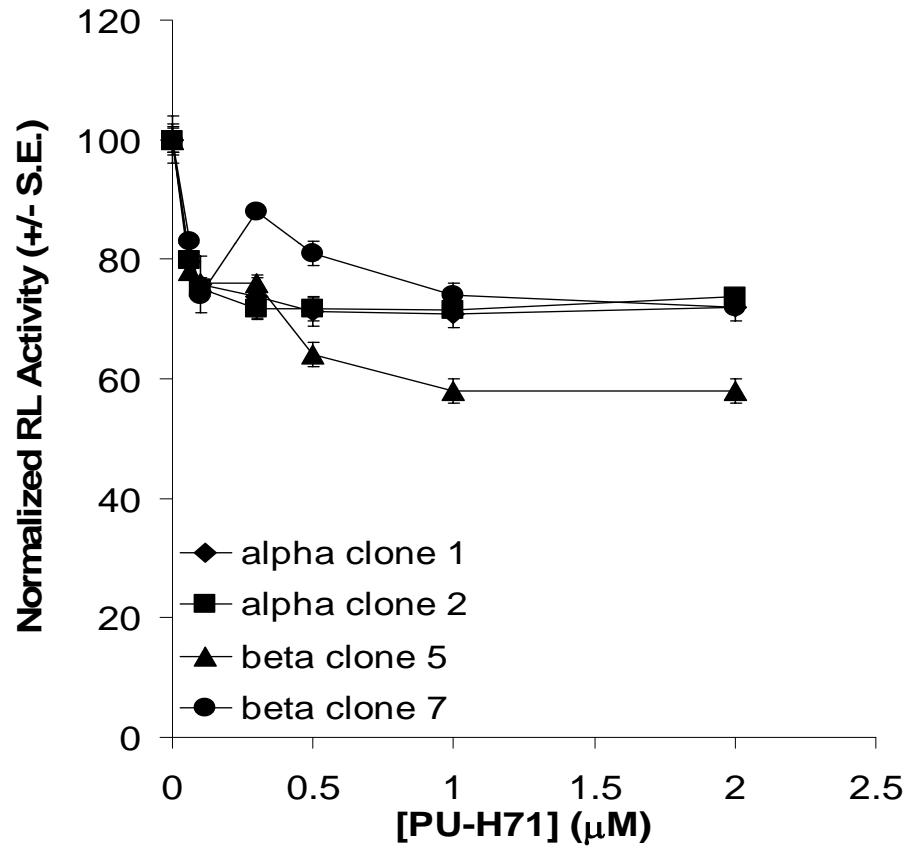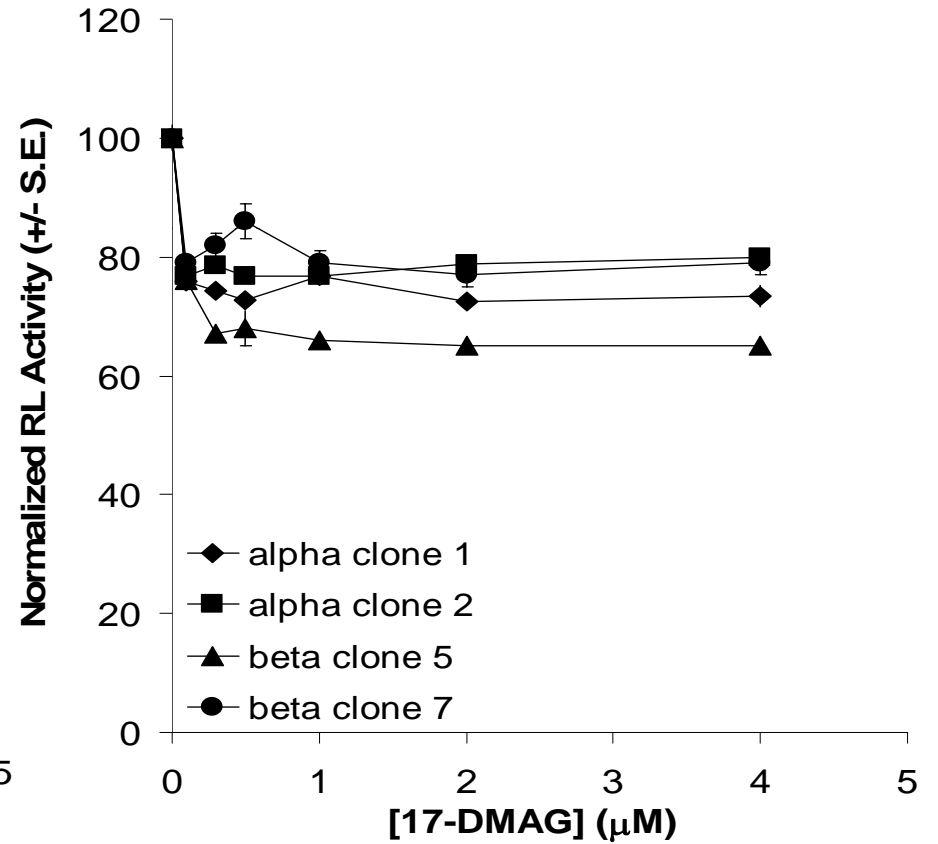

Supplement: NIHMS621605-supplement-Supplementary_Figure_1.pdf [file NIHMS621605-supplement-Supplementary_Figure_1.pdf]
